# Supplementary material for: Flow chemistry enhances catalytic alcohol-to-alkene dehydration
Source: Royal Society of Chemistry journal article supplement (doi:10.1039/d4cy00913d), 2024-01-01
Supplement: d4cy00913d1.pdf [file d4cy00913d1.pdf]

ESI

## Supporting information for: Flow chemistry enhances catalytic alcohol-to-alkene dehydration

D. J. Ward,<sup>a</sup> D. J. Saccomando,<sup>b</sup> F. Vilela,<sup>a</sup> G. Walker<sup>b</sup> and S. M. Mansell<sup>a,\*</sup>

<sup>a</sup> Institute of Chemical Sciences, School of Engineering and Physical Sciences, Heriot-Watt University, Edinburgh, EH14 4AS, UK. Email: s.mansell@hw.ac.uk; Web: www.mansellresearch.org.uk.

<sup>b</sup> Lubrizol Limited, The Knowle, Nether Lane Hazelwood, Derby, Derbyshire, DE56 4AN, UK.

### Table of Contents

|                                                                |           |
|----------------------------------------------------------------|-----------|
| <b>General experimental</b> .....                              | <b>2</b>  |
| <b>Reagents</b> .....                                          | <b>2</b>  |
| <b>Catalysts</b> .....                                         | <b>2</b>  |
| <b>Autoclave and flow system</b> .....                         | <b>2</b>  |
| <b>Analysis</b> .....                                          | <b>3</b>  |
| <b>1-Hexanol dehydration to a mixture of hexenes</b> .....     | <b>3</b>  |
| Gas chromatography .....                                       | 3         |
| <b>2-Methyl-butanol dehydration to 2-methyl-1-butene</b> ..... | <b>5</b>  |
| Gas chromatography .....                                       | 5         |
| <b>Catalytic reactions using batch conditions</b> .....        | <b>6</b>  |
| <b>General method</b> .....                                    | <b>6</b>  |
| <b>Batch Reactor validation</b> .....                          | <b>6</b>  |
| Mass transfer .....                                            | 6         |
| Blanks .....                                                   | 6         |
| <b>Batch Results</b> .....                                     | <b>7</b>  |
| <b>Dihexyl ether reactions</b> .....                           | <b>7</b>  |
| <b>Oligomerisation products</b> .....                          | <b>8</b>  |
| Hexanol dehydration .....                                      | 8         |
| 2-Methyl-1-butanol dehydration .....                           | 8         |
| Isobutanol Dehydration .....                                   | 10        |
| <b>Table S3. Substrate Comparison</b> .....                    | <b>11</b> |
| <b>CSTR reaction</b> .....                                     | <b>12</b> |
| <b>CSTR Setup</b> .....                                        | <b>12</b> |
| <b>CSTR Method</b> .....                                       | <b>12</b> |
| <b>CSTR Validation</b> .....                                   | <b>12</b> |
| Mass transfer .....                                            | 13        |
| Blanks .....                                                   | 13        |
| Interphase gradients .....                                     | 14        |
| <b>CSTR results</b> .....                                      | <b>14</b> |

|                        |           |
|------------------------|-----------|
| Fine screen .....      | 14        |
| Activity .....         | 18        |
| <b>References.....</b> | <b>18</b> |

## General experimental

### Reagents

Used as received: 1-Hexanol (99 %, Thermo Scientific), 1-Hexene (99 %, Thermo Scientific), Dihexyl ether (98 %, Thermo Scientific), ( 2-Methyl-1-butanol (98 %, Thermo Scientific), 2-Methyl-1-butene (98%, Thermo Scientific), 1-Pentanol (99 %, Thermo Scientific), 1-Pentanol, Ethylacetate (99%,Fisher Chemicals) , Diethyl ether (99%,Fisher Chemicals) ,Paraffin oil (Sigma-Aldrich).

### Catalysts

Used as received: Hafnium triflate (98% hafnium(IV) trifluoromethanesulfonate, Thermo Scientific), iron triflate (90 % iron(III) trifluoromethanesulfonate, Thermo Scientific), triflic acid (99% trifluoromethane sulfonic acid, Thermo Scientific), sulfuric acid (95 %, Fisher Chemicals), boron trifluoride diethyl etherate (Fluka Analytical), methyltrioxorhenium (98% methyltrioxorhenium(VII) (MTO), Thermo Scientific), triphenylphosphine (99%, Acros Organics), gadolinium triflate (98% gadolinium(III) trifluoromethanesulfonate, Aldrich),  $\gamma$ -Alumina (Sasol SA: 150m<sup>3</sup> / g), aluminium chloride (Sigma Aldrich), which was sublimed under vacuum before use.

### Autoclave and flow system

Autoclave: Parr Hastelloy autoclave (100 mL) with PTFE insert and magnetic stirrer bar.

Flow Machine: Vapourtec E-Series fitted with Vapourtec PTFE tubing and fittings.

Autoclave used for batch reactions and as the CSTR in the flow setup: Parr Hastelloy autoclave (100 mL).

## Analysis

### 1-Hexanol dehydration to a mixture of hexenes

#### Gas chromatography

Method used for analysis of hexenes produced in preliminary catalyst screening reactions (Figure 1)

Shimadzu GC-2014 using He carrier gas and FID detector. Column: Agilent J&W DB-WAXETR (PEG stationary phase, 60 m, 0.320 mm, 1.00  $\mu\text{m}$ ). 1-Pentanol was used as the internal standard.

Method: Starting oven temperature 55°C, heat to 60°C at 1°C min<sup>-1</sup>, then heated to 250°C at 30°C min<sup>-1</sup>, hold for 5 minutes.

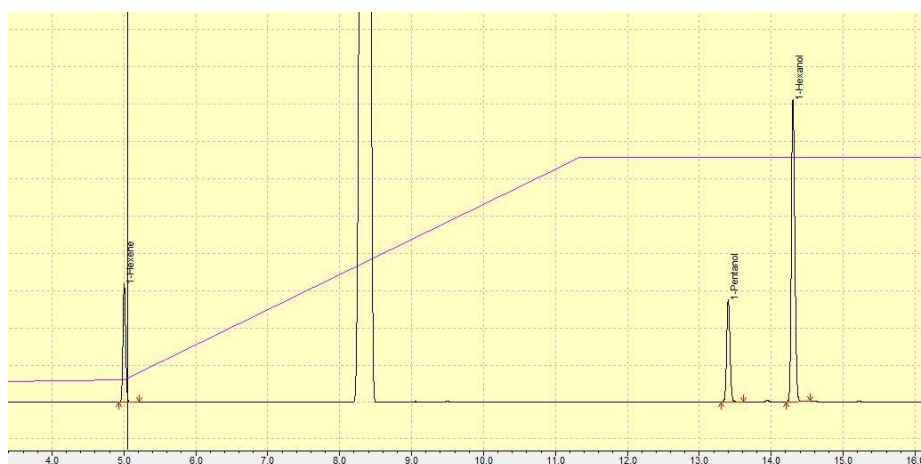

Figure S1. GC chromatograph of hexanol and 1-hexene.

#### Chromatographs of hexenes produced in reactions

##### 1. On WAXETR

To test for the thermodynamic distribution of hexenes, hex-1-ene (0.3 mL) diluted in ethyl acetate (30 mL) isomerised using nickel phosphite catalyst (73 mg). Samples taken every 10 minutes and quenched with H<sub>2</sub>SO<sub>4</sub> (1M in methanol) then injected into GC-FID. The integrations stopped changing after 2 hours at the thermodynamic distribution. The ratio of hex-1-ene : hex-2-ene : hex-3-ene was the same as what is seen in the distribution of hexene isomers from the dehydration of hexanol in the catalytic reactions.

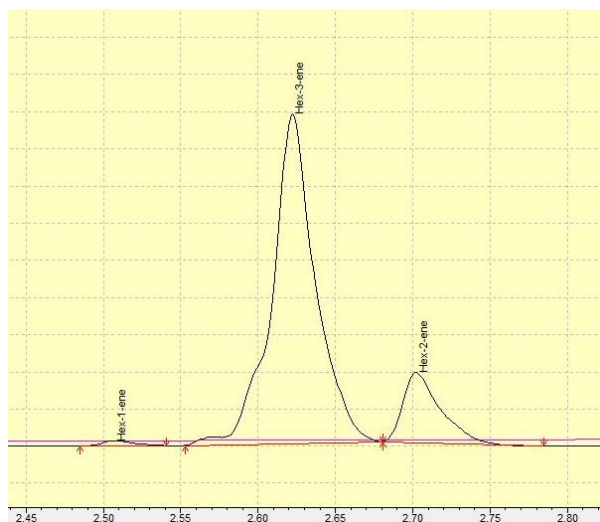

Figure S2. GC chromatograph of hexene isomers as produced in dehydration: 83% hex-3-ene, 15% hex-2-ene and 1% hex-1-ene.

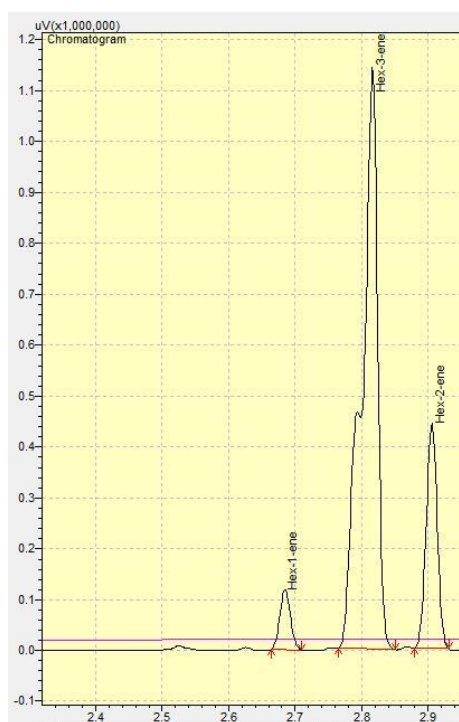

Figure S3. GC chromatograph of hexene isomers from isomerisation of 1-hexene. From an independent experiment run to give the thermodynamic distribution of hexene isomers as a comparison from isomerisation of hex-1-ene using  $[\text{Ni}\{\text{P}(\text{OEt})_3\}_4] / \text{H}^+$  as the catalyst.

## 2. On DB5

Method used for analysis of hexene isomers and for analysis of hexenes, dihexyl ether and hexanol to produce time profiles of  $\text{Hf}(\text{OTf})_4$  and  $\text{HOTf}$  (Figure 2a and 2b in main paper):

Shimadzu GC-2014 using He carrier gas and FID detector. Column: Agilent DB5 (30 m, 0.25 mm, 0.25  $\mu\text{m}$ ).

ESI

Method: Starting oven temperature 40°C, heat to 45°C at 1.5°C min<sup>-1</sup>, then heat to 320°C at 30°C min<sup>-1</sup>, hold for 3 minutes.

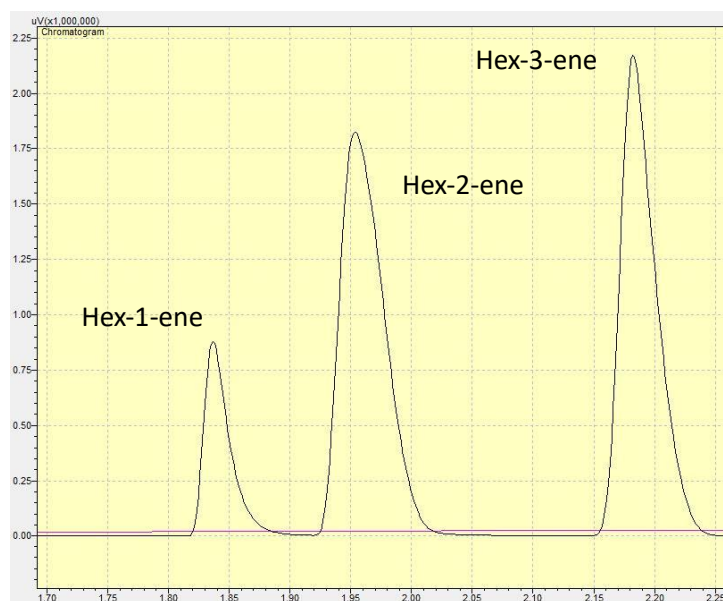

Figure S4. GC chromatograph of hexene isomers.

## 2-Methyl-butanol dehydration to 2-methyl-1-butene

### Gas chromatography

Shimadzu GC-2014 using He carrier gas and FID detector. Column: Agilent J&W DB-WAXETR (PEG stationary phase, 60 m, 0.320 mm, 1.00 µm). 1-Pentanol was used as the internal standard.

Method: Starting oven temperature 55°C, heat to 60°C at 1°C min<sup>-1</sup>, then heated to 250°C at 30°C min<sup>-1</sup>, hold for 5 minutes.

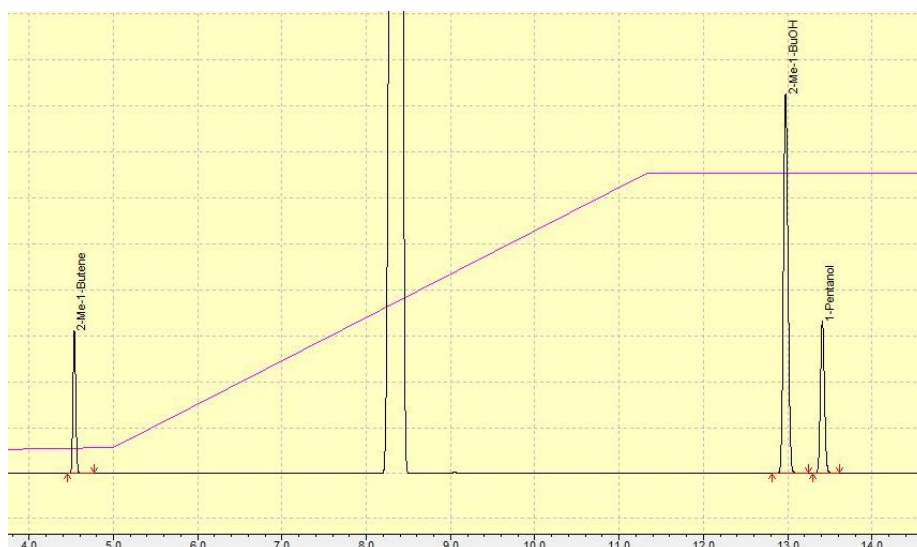

Figure S5. GC chromatograph of 2-methylbutanol and 2-methylbutene.

## Catalytic reactions using batch conditions

### General method

Hf(OTf)<sub>4</sub> (0.154 g, 0.199 mmol, 0.5 mol%), was added to a clean oven-dried fitted PTFE insert inside a glove box. The insert was sealed within a 100 cm<sup>3</sup> Parr stainless steel autoclave which was then transferred to a N<sub>2</sub>/vacuum manifold. Hexanol (5mL, 39.83 mmol) was injected into the autoclave through an inlet against a flow of nitrogen. The autoclave was sealed and placed into a pre-heated (180 °C) aluminium heating block. After the reaction run time (4 h), the autoclave was cooled to room temperature in an ice-water bath. The autoclave was vented to remove any gas generated during the reaction. A liquid sample was removed, filtered through a short plug of alumina (acidic) and analysed by GC (100 µL of sample, 1.7 cm<sup>3</sup> EtOAc pentanol internal standard solution – sample refiltered through a glass filter paper to remove insoluble salts).

### Batch Reactor validation

#### Mass transfer

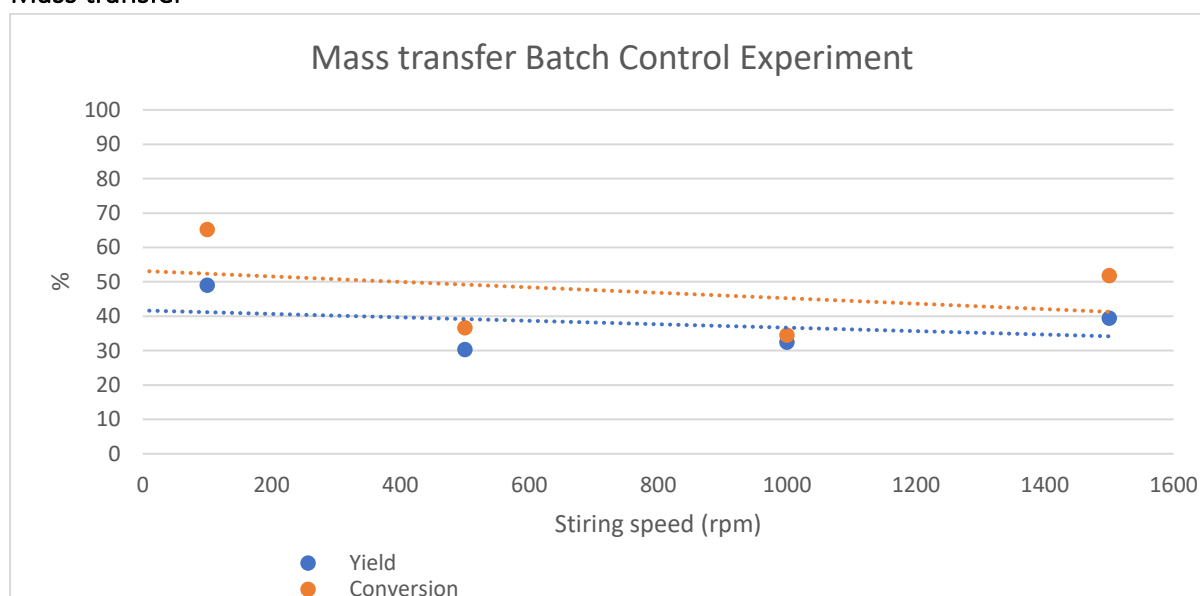

Figure S6. Effect of stir speeds on yield and conversion of hexanol to hexene. Reaction conditions: Hf(OTf)<sub>4</sub> (0.5 mol%), 4h, 180°C, Hexanol (5 mL)

No significant effect on yield and conversion due to stir rate.

#### Blanks

The reactor was assessed to see if the reactor walls catalysed the dehydration of hexanol to hexene using the reaction conditions: 4 hours, 500 rpm, hexanol (5 mL). It was found that they had little no influence on yield and conversion of hexanol to hexene. (table xx)

**Table S1.** Blank reactions

| Yield (%) | Conversion (%) |
|-----------|----------------|
| 0         | 2.2            |
| 0         | 2.4            |

## Batch Results

Conversion of alcohol can reach 92% after 16 hours, however, yield of alkene stops at 50%. We believe this is due to further reactions of alkene forming polymer species as it is being formed.

ToN = moles alkene / moles of catalyst

ToN after 4 hours: 76

**Table S2.** ToN after 4 hours

| Catalyst                       | Substrate          | mol % | ToN | ToF (h <sup>-1</sup> ) |
|--------------------------------|--------------------|-------|-----|------------------------|
| Hf(OTf) <sub>4</sub>           | 1-Hexanol          | 0.5   | 76  | 19                     |
|                                | 2-Methyl-1-butanol | 0.5   | 37  | 9                      |
| Fe(OTf) <sub>3</sub>           | 1-Hexanol          | 2.5   | 114 | 28                     |
|                                |                    | 0.5   | 12  | 3                      |
| HOTf                           | 1-Hexanol          | 5     | 9   | 2                      |
|                                |                    | 0.5   | 9   | 2                      |
| H <sub>2</sub> SO <sub>4</sub> | 1-Hexanol          | 5     | 16  | 4                      |
|                                |                    | 0.5   | 4   | 1                      |
| No catalyst                    | 1-Hexanol          | 0     | N/A | N/A                    |

## Dihexyl ether reactions

Hf(OTf)<sub>4</sub> (0.077 g, 0.199 mmol, 0.5 mol%), was added to a clean oven-dried fitted PTFE insert inside a glove box. The insert was sealed within a 100 cm<sup>3</sup> Parr stainless steel autoclave which was then transferred to a N<sub>2</sub>/vacuum manifold. Dihexyl ether (2.4 mL, 19.91 mmol) was injected into the autoclave through an inlet against a flow of nitrogen. The autoclave was sealed and placed into a pre-heated (180 °C) in aluminium heating block. After the reaction run time (4 h), the autoclave was cooled to room temperature in an ice-water bath. The autoclave was vented to remove any gas generated during the reaction. A liquid sample was removed, filtered through a short plug of alumina (acidic) and analysed by GC (100 µL of sample, 1.7 cm<sup>3</sup> Et<sub>2</sub>O pentanol internal standard solution – sample refiltered through a glass filter paper to remove insoluble salts).

A stock solution of HOTf was made in toluene (0.1 mL HOTf in 12.5 mL toluene) 1 mL of stock (0.199 mmol, 0.5 mol% HOTf), was added to a clean oven-dried fitted PTFE insert inside a glove box. The insert was sealed within a 100 cm<sup>3</sup> Parr stainless steel autoclave which was then transferred to a N<sub>2</sub>/vacuum manifold. Dihexyl ether (2.4 mL, 19.91 mmol) was injected into the autoclave through an inlet against a flow of nitrogen. The autoclave was sealed and placed into a pre-heated (180 °C) in aluminium heating block. After the reaction run time (4 h), the autoclave was cooled to room temperature in an ice-water bath. The autoclave was vented to remove any gas generated during the reaction. A liquid sample was removed, filtered through a short plug of alumina (acidic) and analysed by GC (100 µL of sample, 1.7 cm<sup>3</sup> Et<sub>2</sub>O pentanol internal standard solution – sample refiltered through a glass filter paper to remove insoluble salts).





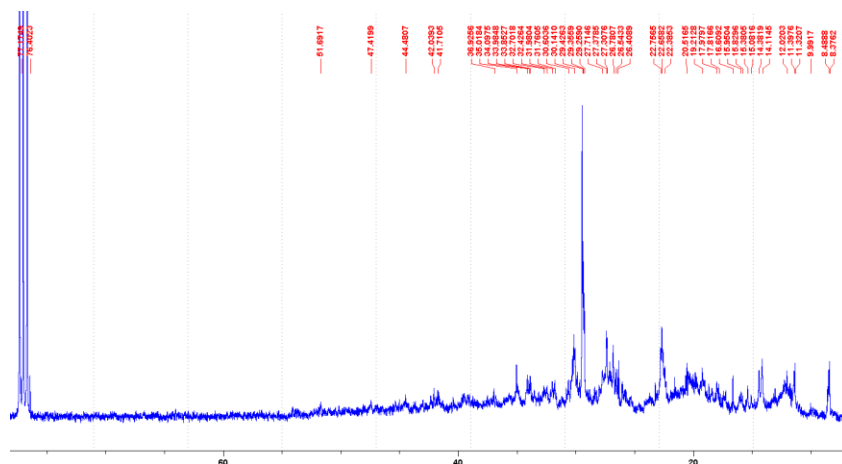

Figure S10.  $^{13}\text{C}\{^1\text{H}\}$  NMR spectrum from 2-methyl-1-butanol dehydration.

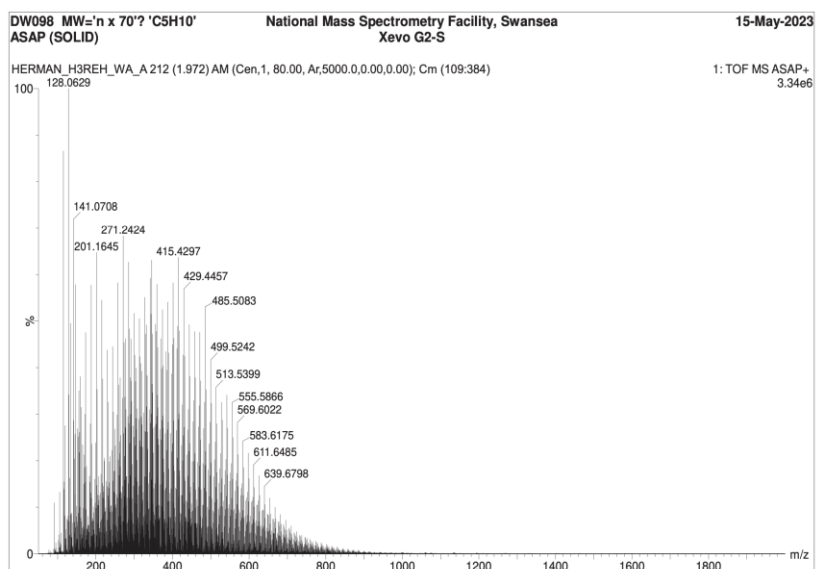

Figure S11. ASAP mass spectrum from 2-methyl-1-butanol dehydration.

### Isobutanol Dehydration

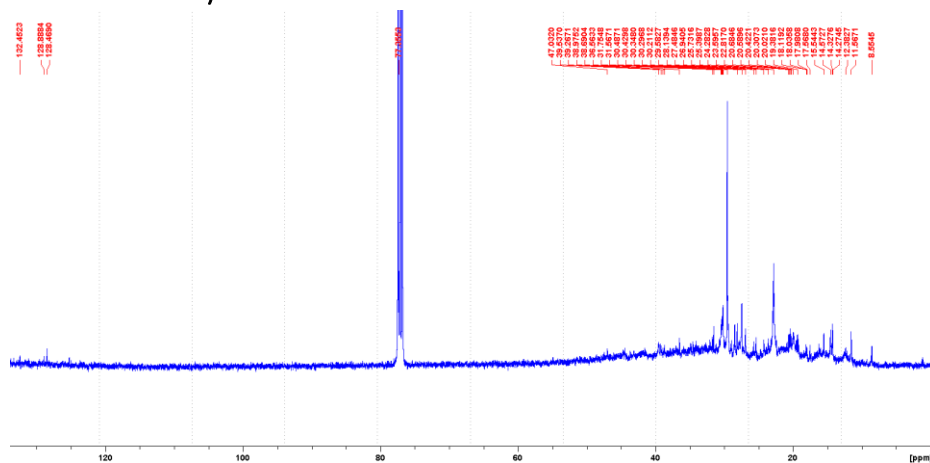

Figure S12.  $^{13}\text{C}\{^1\text{H}\}$  NMR spectrum from isobutanol dehydration.

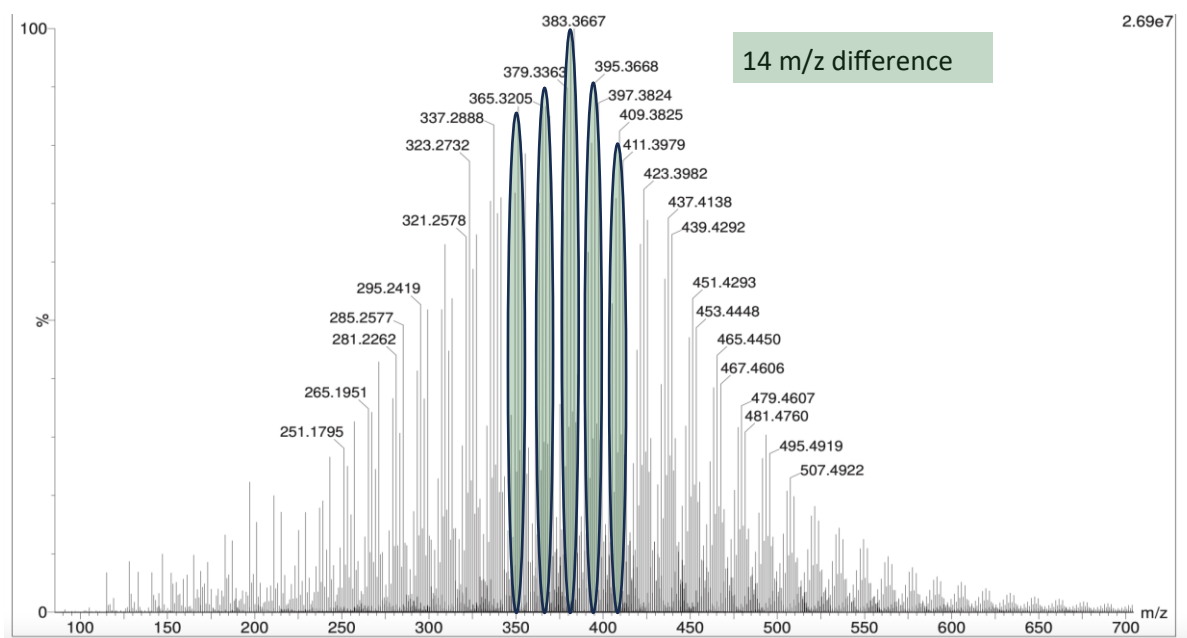

Figure S13. ASAP mass spectrum from isobutanol dehydration (4 h reaction).

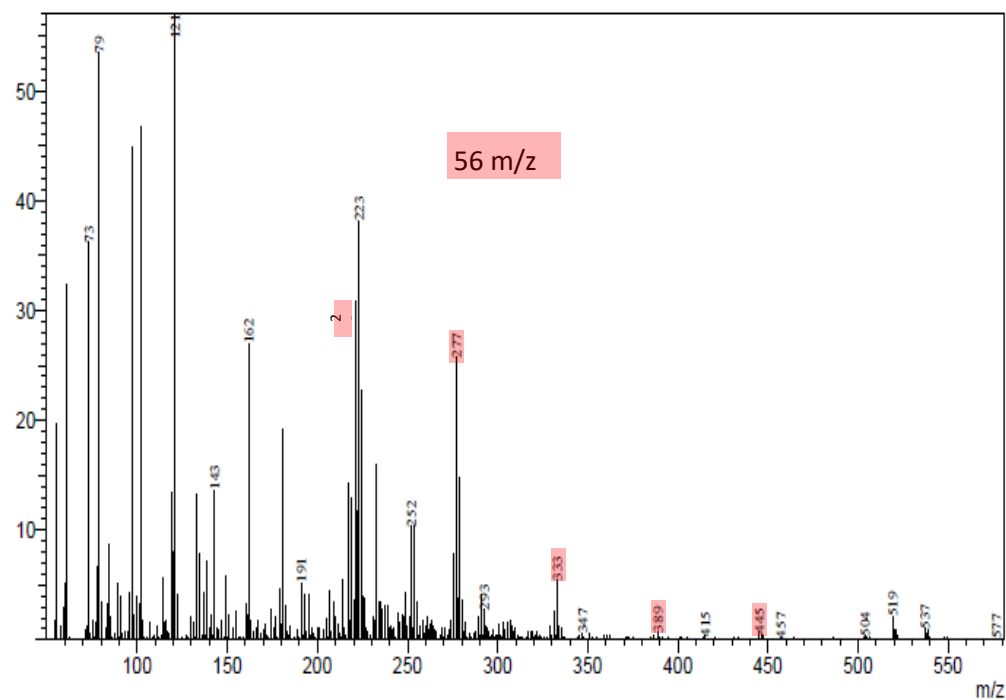

Figure S14. ASAP mass spectrum from isobutanol dehydration (1 h reaction).

Table S3. Substrate Comparison

| Temperature (°C) | Time (h) | Hexanol to Hexene |                |                 | 2-Methylbutanol to 2-methyl butene |                |                 |
|------------------|----------|-------------------|----------------|-----------------|------------------------------------|----------------|-----------------|
|                  |          | Yield (%)         | Conversion (%) | Selectivity (%) | Yield (%)                          | Conversion (%) | Selectivity (%) |
| 180              | 1        | 5.4               | 85.0           | 6.3             | 15.8                               | 54.8           | 29.0            |

Reaction conditions: 180 °C, 1 hour, Hf(OTf)<sub>4</sub> (0.5 mol%), 500 rpm, 100 mL Autoclave

Results show a branched alcohol is easier to dehydrate but the alkene is more reactive.

## CSTR reaction

### CSTR Setup

Flow Machine: Vapourtec E-Series fitted with Vapourtec PTFE tubing and fittings.

Autoclave used for batch reactions and as the CSTR in the flow setup: Parr Hastelloy autoclave (100 mL).

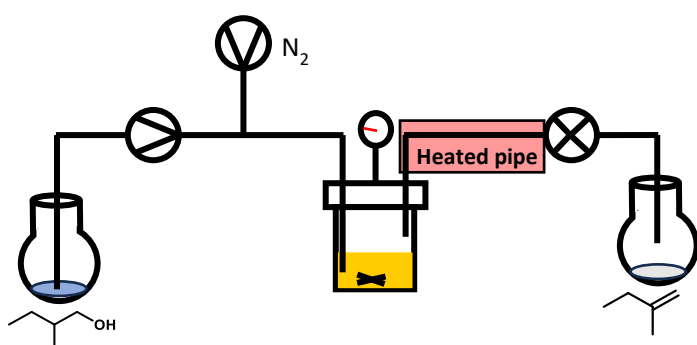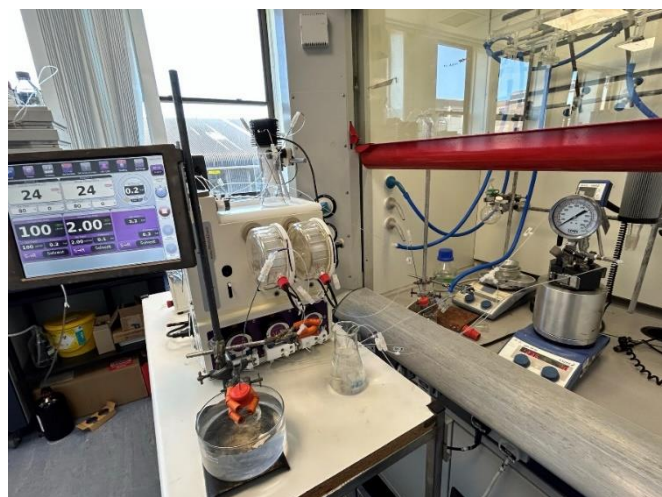

Figure S15. CSTR set up.

### CSTR Method

[Hf(OTf)<sub>4</sub>] (0.5476 g, 0.706 mmol), and paraffin oil (5 mL) were added to a clean oven-dried PTFE insert inside a glove box. The insert was sealed within a 100 cm<sup>3</sup> Parr Hastelloy autoclave which was then placed in the preheated aluminium block (180°C) and hooked up to the Vapourtec E series via vapourtec tubing and fittings as shown above with a stir rate of 500 rpm. The tubing was purged with N<sub>2</sub> (100 mL min<sup>-1</sup>). The valves on the autoclaves were opened and system was pressurized to 1.4 barg using N<sub>2</sub>. Once the autoclave was up to temperature and pressure the flow of 2-methylbutanol (0.1 mL min<sup>-1</sup>) was started. T<sub>0</sub> was determined from when the alcohol entered the reactor. Samples were taken directly from the eluent at 20-minute intervals. The sample was analysed using GC-FID (25 μL of sample, 0.4 cm<sup>3</sup> EtOAc/pentanol internal standard solution).

### CSTR Validation

The CSTR was evaluated through a series of control experiments design to asses: mass transfer, concentration gradients and if the reactor walls would catalyse the reaction. To assess mass transfer the yield and conversion were measured at multiple different stirring rates (Figure S15). It was determined that there was no significant variation in conversion and yield with stir rate therefore the reaction was not under mass transfer control. The concentration gradients were assessed in a similar way but by measuring the effect of stirring rate on the activity of the catalyst. This again showed no effect meaning the reactor was free from concentration gradients (Figure S17). The reactor walls were tested by adding no catalyst, here we found no meaningful yield or conversion was produced by the reactor walls (Figure S16).<sup>1</sup>

## Mass transfer

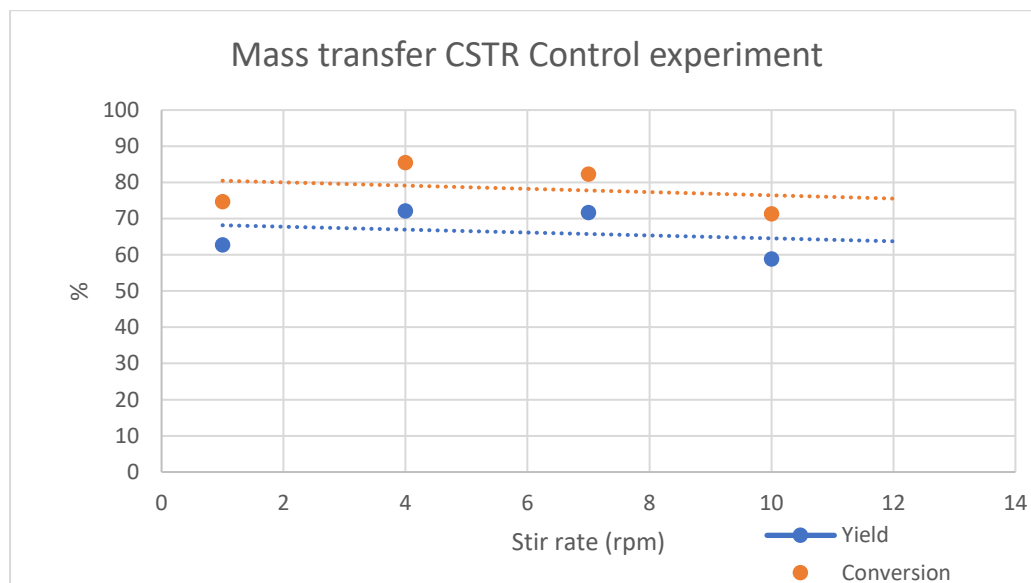

Figure S16. Effect of stir speeds on yield and conversion of 2-Methylbutanol to 2-methylbutene. Reaction Conditions: 180°C,  $\text{Hf}(\text{OTf})_4$  (0.35 g), Paraffin oil (5 mL), 2-Me-BuOH flow rate 0.1 mLmin<sup>-1</sup> Flow rate N<sub>2</sub> 2 mLmin<sup>-1</sup>, Pressure 3.1 bar.

No significant effect on yield and conversion due to stir rate. Reactor is free of mass transfer issues.

## Blanks

Reaction setup was tested with no  $\text{Hf}(\text{OTf})_4$  for 100 minutes. The volatiles collected in the collection flask were analysed (5 data points). Average yield of 2-methyl-1-butenes: 1.0%. Average conversion: 0%.

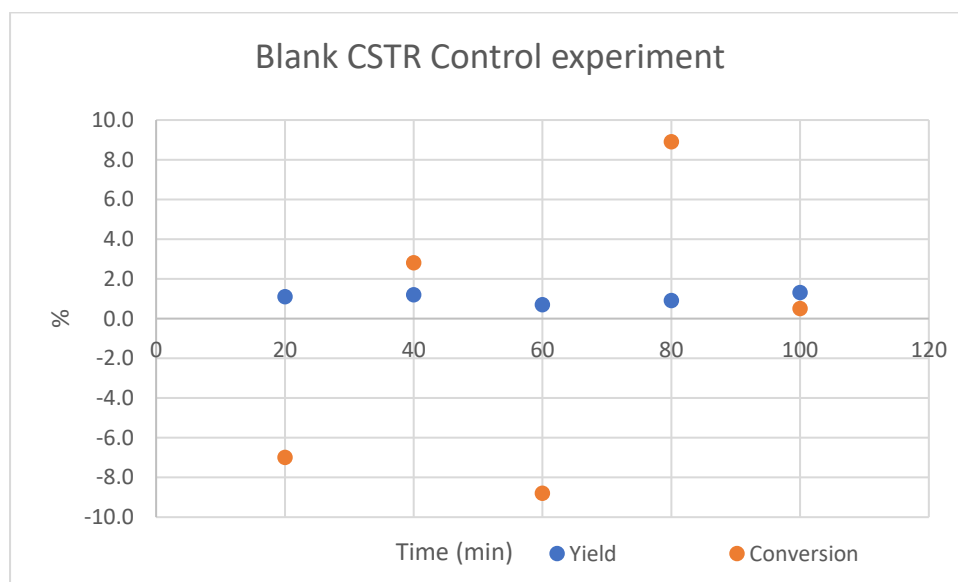

Figure S17. Control experiment: Blank run in CSTR with 2-methylbutanol. Reaction Conditions: 180°C, Paraffin oil (5 mL), 500 rpm, 2-Me-BuOH flow rate 0.1 mLmin<sup>-1</sup> Flow rate N<sub>2</sub> 2 mLmin<sup>-1</sup>, Pressure 3.1 bar.

## Interphase gradients

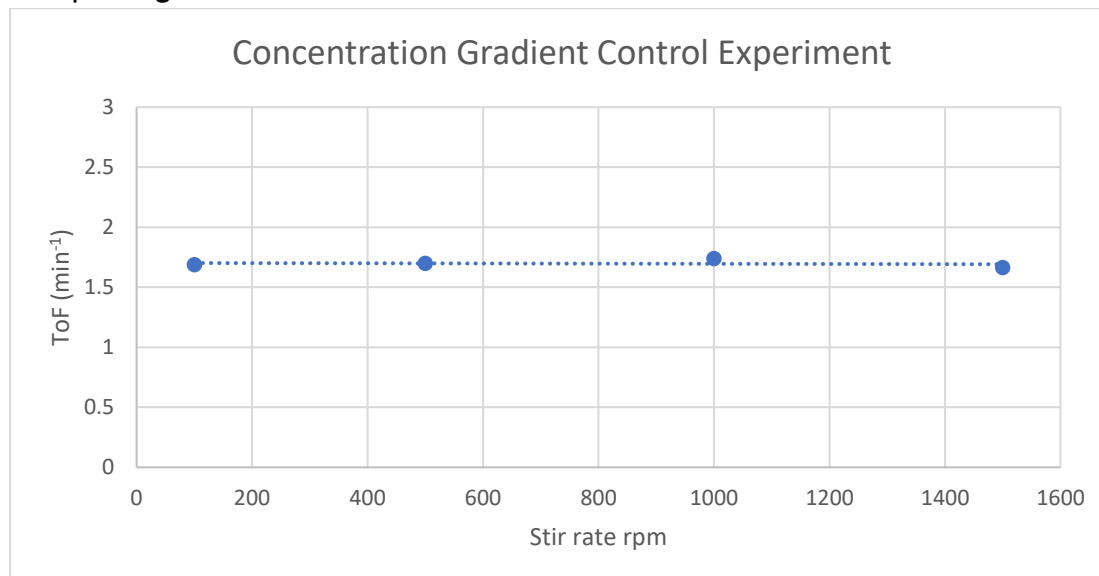

Figure S18. Effect of stirring rate on turn over frequency (ToF). Reaction Conditions: 180°C, Hf(OTf)<sub>4</sub> (0.35 g), Paraffin oil (5 mL), 2-Me-BuOH flow rate 0.1 mLmin<sup>-1</sup> Flow rate N<sub>2</sub> 2 mLmin<sup>-1</sup>, Pressure 3.1 bar.

No significant effect on rate of reaction due to stir rate, therefore reactor is free of concentration gradients.

## CSTR results

## Fine screen

**Table S4.** Catalyst testing operating conditions for 2-methyl-1-butanol dehydration reactions in the CSTR

| Optimised catalytic conditions | For screening activity            | For screening selectivity               | For producing pure alkene         |
|--------------------------------|-----------------------------------|-----------------------------------------|-----------------------------------|
| Paraffin oil                   | 5 mL                              | 5 mL                                    | 5 mL                              |
| Catalyst                       | 0.705 mmol                        | 0.705 mmol                              | 0.705 mmol                        |
| Reactor volume                 | 100 mL                            | 100 mL                                  | 100 mL                            |
| Stirring rate                  | 500 rpm                           | 500 rpm                                 | 500 rpm                           |
| N <sub>2</sub>                 | 100 mL min <sup>-1</sup> (gas)    | 100 mL min <sup>-1</sup> (gas)          | 100 mL min <sup>-1</sup> (gas)    |
| 2-methyl-1-butanol             | 0.1 mL min <sup>-1</sup> (liquid) | 0.1 - 0.2 mL min <sup>-1</sup> (liquid) | 0.1 mL min <sup>-1</sup> (liquid) |
| Pressure                       | 1.4 barg                          | 1.4 barg                                | 3.1 barg                          |
| Reactor temperature            | 180°C                             | 180°C                                   | 180°C                             |
| Outlet temperature             | 160°C                             | 160°C                                   | Room temperature                  |

Altering residence time in the reactor by changing the flow rate of alcohol through the system:

Individual results:

Hf(OTf)<sub>4</sub>:

**Table S5.** Hf(OTf)<sub>4</sub> average yield, conversion, selectivity and mass balance for each flow rate tested

| Flow rate (mL/min) | Yield (%) | Conversion (%) | Selectivity (%) | Mass balance |
|--------------------|-----------|----------------|-----------------|--------------|
| 0.100              | 30.7      | 65.4           | 46.9            | 0.838        |
| 0.133              | 22.2      | 44.1           | 50.1            | 0.709        |
| 0.166              | 19.6      | 38.2           | 51.6            | 0.542        |
| 0.200              | 17.5      | 27.7           | 62.5            | 0.642        |

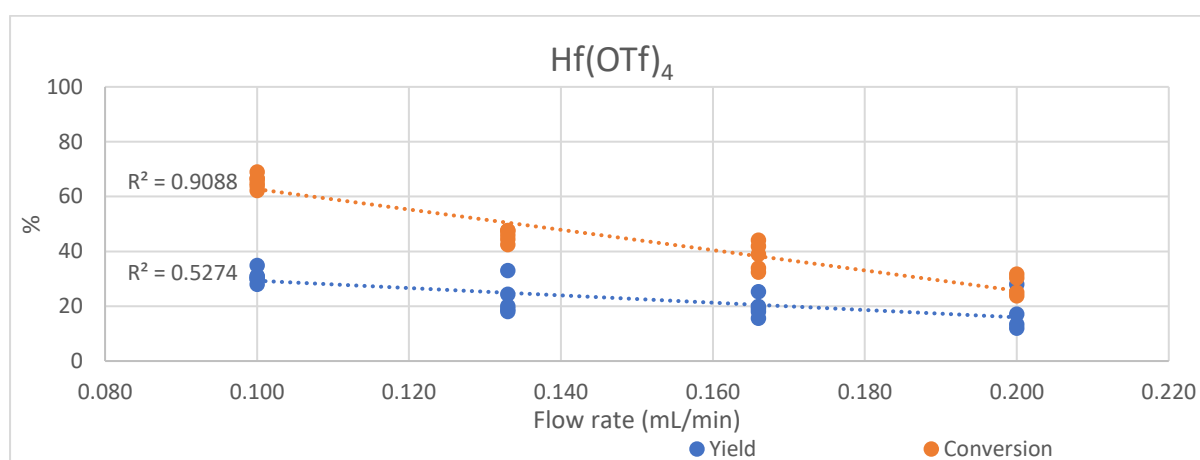

Figure S19. Effect of flow rate on yield and conversion in 2-methyl-1-butanol dehydration reactions using Hf(OTf)<sub>4</sub> as the catalyst.

HOTf:

**Table S6.** HOTf average yield, conversion, selectivity and mass balance for each flow rate tested

| Flow rate (mL/min) | Yield (%) | Conversion (%) | Selectivity (%) | Mass Balance |
|--------------------|-----------|----------------|-----------------|--------------|
| 0.100              | 25.4      | 53.1           | 47.8            | 0.715        |
| 0.133              | 31.5      | 51.7           | 61.0            | 0.867        |
| 0.166              | 15.5      | 34.0           | 43.1            | 0.867        |
| 0.200              | 2.0       | 4.3            | 53.2            | 1.065        |

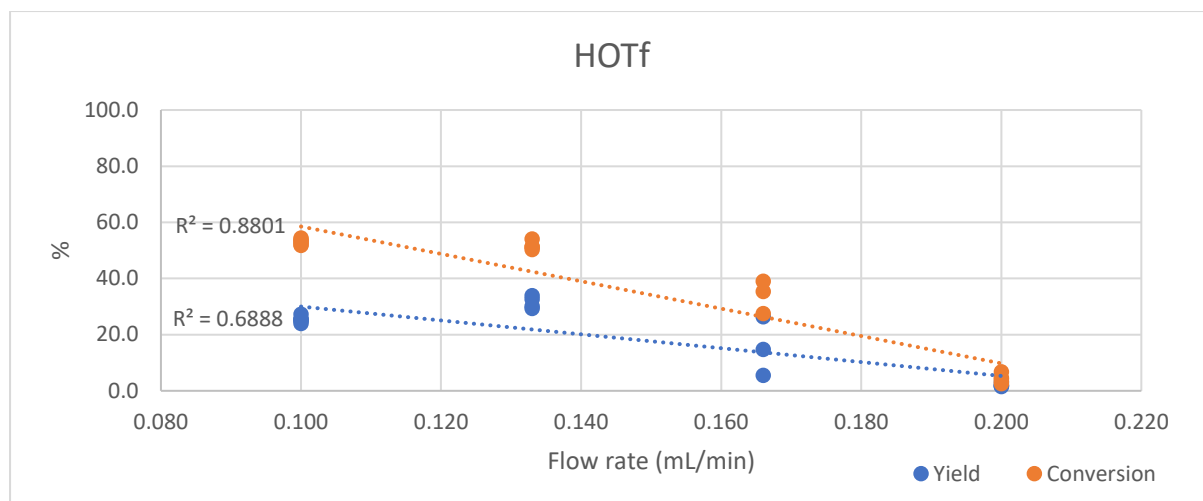

Figure S20. Effect of flow rate on yield and conversion in 2-methyl-1-butanol dehydration reactions using HOTf as the catalyst.

Fe(OTf)<sub>3</sub>:

**Table S7.** Fe(OTf)<sub>3</sub> average yield, conversion, selectivity and mass balance for each flow rate tested

| Flow rate (mL/min) | Yield (%) | Conversion (%) | Selectivity (%) | Mass Balance |
|--------------------|-----------|----------------|-----------------|--------------|
| 0.050              | 22.4      | 64.9           | 34.7            | 0.616        |
| 0.100              | 10.1      | 30.5           | 34.8            | 0.956        |
| 0.133              | 4.4       | 8.4            | 67.0            | 1.066        |
| 0.166              | 1.8       | 2.7            | 85.6            | 1.135        |

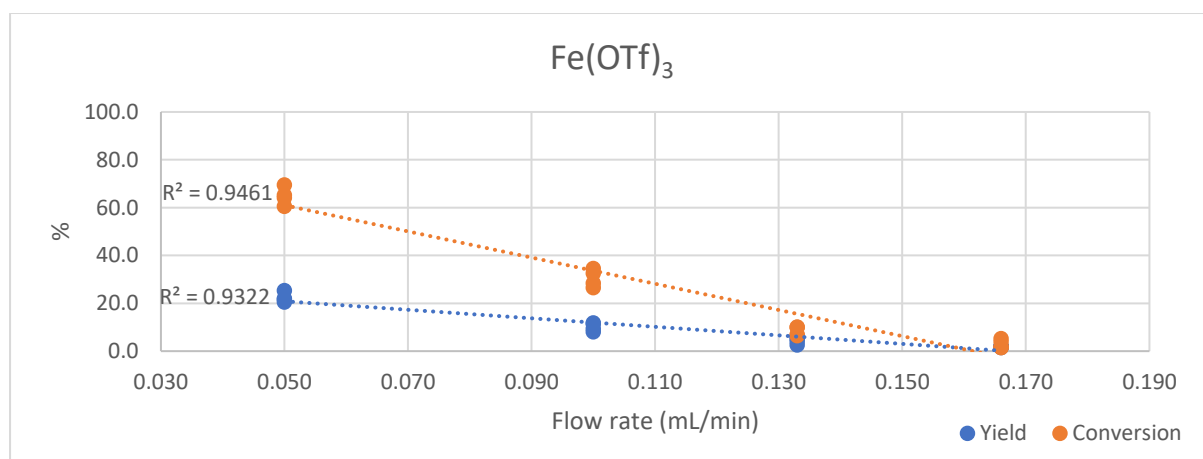

Figure S21. Effect of flow rate on yield and conversion in 2-methyl-1-butanol dehydration reactions using Fe(OTf)<sub>3</sub> as the catalyst.



ESI

H<sub>2</sub>SO<sub>4</sub>:

**Table S8.** H<sub>2</sub>SO<sub>4</sub> average yield, conversion, selectivity and mass balance for each flow rate tested

| Flow rate (mL/min) | Yield (%) | Conversion (%) | Selectivity (%) | Mass balance |
|--------------------|-----------|----------------|-----------------|--------------|
| 0.050              | 0.5       | 8.9            | 9.4             | 1.268        |
| 0.100              | 0.8       | 2.7            | 40.9            | 1.258        |
| 0.133              | 0.5       | 1.6            | 44.7            | 1.136        |

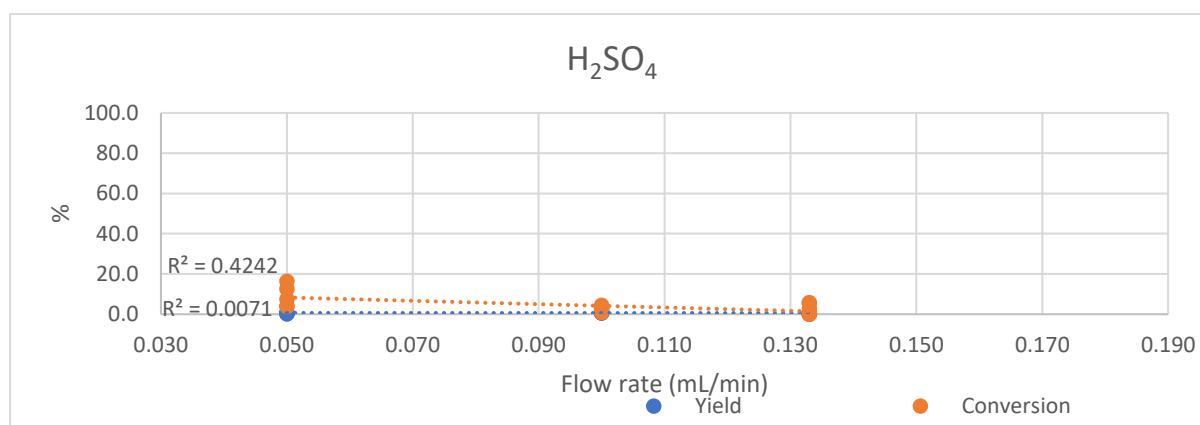

Figure S22. Effect of flow rate on yield and conversion in 2-methyl-1-butanol dehydration reactions using H<sub>2</sub>SO<sub>4</sub> as the catalyst.

## Activity

Activity can be measured in multiple ways, we opted to measure in two ways the first was by using the equation (equation 1) for CSTR that converts mass balance to turnover frequency using conversion of starting material under the same conditions (see paper).

$$V_t = \frac{F_0 \times x}{n_c} \quad x = \frac{F_0 - F_1}{F_0}$$

V<sub>t</sub>: Turnover rate

x : Fractional conversion of reactant ( $x = \frac{F_0 - F_1}{F_0}$ )

F<sub>0</sub>: Molar flowrate of reactant into the reactor

F<sub>1</sub>: Molar flow rate of unconverted reactant leaving the reactor

n<sub>c</sub>: Moles of catalyst

**Equation 1.** Mass balance equation for calculating turnover frequency from a CSTR

The second way was by altering the flow rate of the alcohol and therefore the residence time of the alcohol required to generate 30% conversion of starting material. The faster the flow rate the shorter residence time is required. This can be seen in figure S23. Both The results show Hf(OTf)<sub>4</sub> to be the most active followed by HOTf then Fe(OTf)<sub>3</sub>. This method of activity testing was not sufficient for H<sub>2</sub>SO<sub>4</sub> as it could not generate 30% conversion with our lowest flow rate.

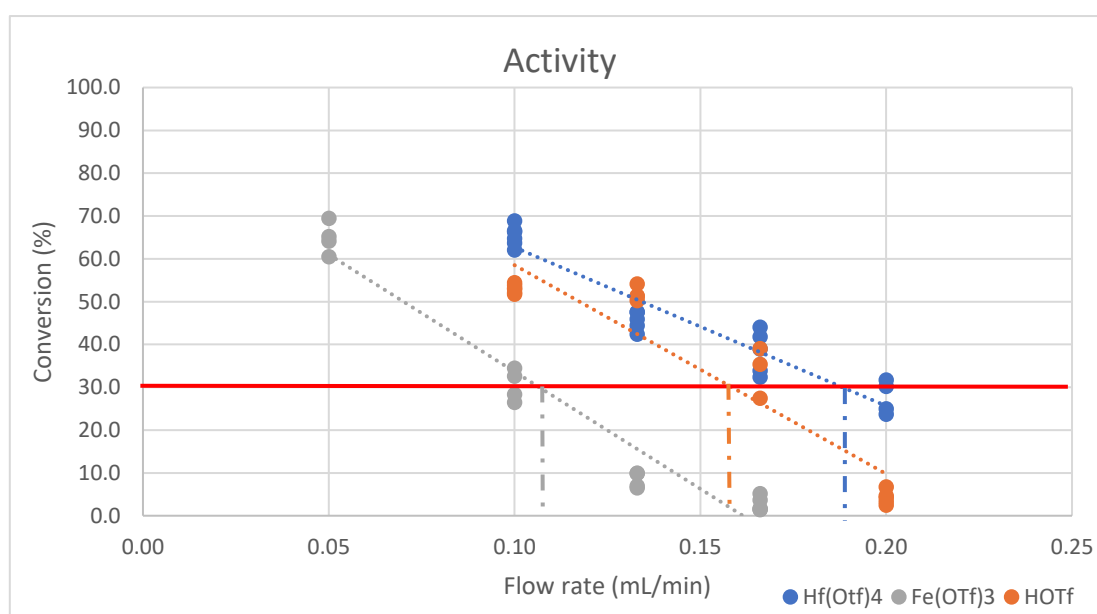

Figure S23. Effect of flow rate on conversion for Hf(OTf)<sub>4</sub>, HOTf and Fe(OTf)<sub>3</sub>. The flow rate required to generate 30% conversion for each catalyst is shown.

## References

1. Catalytica, *A Practical Guide to Catalyst Testing: Basic Guide*, Catalytica, 1987.
